# Supplementary material
Source: PubMed Central journal article supplement (PMC3993320)
Supplement: JB.01401-13_zjb999093124so1.pdf [file JB.01401-13_zjb999093124so1.pdf]

## Supplemental information for:

### **GtfA and GtfB are both required for protein O-glycosylation in *Lactobacillus plantarum***

I-Chiao Lee, Iris I. van Swam, Satoru Tomita, Pierre Morsomme, Thomas Rolain, Pascal Hols, Michiel Kleerebezem, and Peter A. Bron

#### **Supplemental Materials and methods**

**Bacterial strains and growth conditions.** *Lactobacillus plantarum* WCFS1 (wild-type) and *tagE* deletion mutants (see Table 1) were cultured in 20 L MRS broth (Merck, Darmstadt, Germany) at 37°C for 20 hours using a Techfors-S bioreactor (Infors, Bottmingen, Switzerland) at a constant pH of 6.8 by titration of 6M NaOH with a built-in peristaltic pump and stirrer at 100 rpm. The cells were collected by centrifugation using an AVANTI J-25 centrifuge (Beckman-Coulter, Brea, USA) at 9000 × g at room temperature and were subsequently washed once with 200 ml of phosphate buffer saline.

**Preparation of lipoteichoic acid.** Lipoteichoic acid (LTA) of the cells cultured was isolated and purified by butanol extraction, hydrophobic interaction chromatography (HIC), and anion-exchange chromatography as described by Morath *et al.* (1). Briefly, the cells were disrupted by a French press cell (SLM Instruments Inc., Urbana, USA) and supernatants after centrifugation (23000 × g for 30 min at 4°C) were collected by pipetting. Subsequently, the supernatants were extracted with the same volume of butanol for 30 min at room temperature and the water phase was collected and lyophilized after centrifugation at 23000 × g for 30 min at room temperature. The lyophilized fraction was then separated on a Octyl-Sepharose 4 FastFlow column (GE Healthcare, Little Chalfont, UK) with a stepwise elution of 13–31% 1-propanol in 100 mM sodium

acetate buffer (pH 4.7). LTA in the fractions was detected by ashing of organic phosphate (2) as described by Allen R. J. (3). For 2D NMR analysis  $\Delta tagE5E6$ -derived LTA was subsequently purified on a DEAE-Sepharose 4 FastFlow column (GE Healthcare) with a linear gradient elution of 0–1.0 M sodium chloride in sodium acetate buffer by using an AKTA FPLC system (GE Healthcare). LTA in the separated fractions were collected by lyophilisation after dialysis against water.

**Preparation of deacylated and dealanylated LTA.** To improve NMR spectral resolution for signals from anomeric protons of sugar residues, deacylated and dealanylated LTA (dd-LTA) were prepared as described by Simpson *et al.* (4). Briefly, approximately 10 mg of the isolates of the HIC analyses were dissolved in 250  $\mu$ l water, mixed with the same volume of 30% ammonium hydroxide, and incubated overnight at room temperature. The mixtures were extracted with the same volume of chloroform–methanol (1:1, v/v) once, followed by two chloroform extractions. dd-LTA in the solution was collected by lyophilisation.

**NMR spectroscopic analysis of LTA from  $\Delta tagE5E6$  mutant.** LTA from HIC fractions and their dd-LTA were dissolved in 400  $\mu$ l of  $D_2O$  and used for measurement of 1D NMR spectra. Purified LTA from  $\Delta tagE5E6$  was also used for measurement of 2D NMR spectra. The 1D ( $^1H$  and  $^{13}C$ ) and 2D NMR spectra (COSY, H-H correlation spectroscopy; TOCSY, H-H totally correlated spectroscopy; HSQC, H-C hetero-nuclear single quantum coherence; HMBC, H-C hetero-nuclear multiple-bond connectivity) were recorded on an AVANCE III 500 MHz NMR spectrometer (Bruker Daltonics, Bremen, Germany) at 333 K with proton and carbon frequencies of 500.13 MHz and 125.77 MHz. The 2D NMR spectra were acquired with 512 increments of 8 scans for COSY, 512 increments of 16 scans for TOCSY and HSQC, and 1024 increments of 96 scans for HMBC, respectively. Sodium 3-(trimethylsilyl)propionic-2,2,3,3- $d_4$  acid (Sigma-Aldrich, Zwijndrecht, The Netherlands) was used as an internal reference for chemical shift ( $\delta_H$  0.00 and  $\delta_C$  0.00).

## Supplemental figures

### A.

**Protein View:** Acm2 isolated from wild type

Sequence coverage of mature Acm2 (753 aa): **75%**

Sequence coverage of Acm2 AST domain (211 aa): **69%**

```
1  MKIGMTRKVV  TLLLLSTALL  PMLSGKADTA  SANQKPAAAT  KGNSAASAAS
51  QQVTLSAGSQ  TETTAAGATD  QSVASDGAKT  DDQAESTSTT  TATTSATSRV
101 TVRAASQAAK  ADSTGPOSQS  SASEAAKDNA  ATSATADSTT  SAVDQLDKTA
151 KASAATSQAS  HSTTNETAKA  SAAASQDSHV  TTDQSSVTVT  SEVAKSAASS
201 AAPKQATEQA  VAAKISPKIE  TAVAADAVQS  SAMMARSTRA  MTSQEIFLSQ
251 IKAGAISGWN  KYQVLPSVTA  AQAILESGWG  QSQLATQGNN  LFGIKGSYQG
301 QSIYFPTQEW  NGSQYITIQD  AFRKYPNWSA  SVEDHGAFV  VNPRYSNLIG
351 VTDYRRVASL  LQQDGYATAP  TYASSLISII  EYNKLHEWDQ  EALSGQASGG
401 NDNNQVQPDQ  DVTPTSGTHK  FTKTTTIHNA  PDATSAVVGT  YNAGETVNYN
451 GKLTVGNATW  LRYQSYSGVS  RYVMISQTTT  NDNNNQATVT  PASGSYKFTA
501 KTNIRSAASK  TAQVVGTYNA  GETVYYNGKI  TTGGTTWLR  LSYSGAQHYV
551 AMSGDEVGSV  AKPDVVATSG  SYRFTKTTAI  KSSPATSAT  VGSYNAGDTV
601 YYNGKVTTNG  QTWLRYMSYS  GAQHYVQISG  ESTSTNVDPK  QVTPQSGSYR
651 FTQTTAIKNT  PAGNAPSVGT  YSAGDTVYYN  AKVTTANGQ  LRYLSYSGAQ
701 HYVAISGNAA  TGNTTSKPVT  NSQGAFRFVT  TTNIRTAPST  RASVVGEYNP
751 GETVYYNGTV  QAEGYTWLR  LSRSGATHYV  AKLEG
```

### B.

**Protein View:** Acm2 isolated from  $\Delta tagE5E6$

Sequence coverage of mature Acm2 (753 aa): **52%**

Sequence coverage of Acm2 AST domain (211 aa): **59%**

```
1  MKIGMTRKVV  TLLLLSTALL  PMLSGKADTA  SANQKPAAAT  KGNSAASAAS
51  QQVTLSAGSQ  TETTAAGATD  QSVASDGAKT  DDQAESTSTT  TATTSATSRV
101 TVRAASQAAK  ADSTGPOSQS  SASEAAKDNA  ATSATADSTT  SAVDQLDKTA
151 KASAATSQAS  HSTTNETAKA  SAAASQDSHV  TTDQSSVTVT  SEVAKSAASS
201 AAPKQATEQA  VAAKISPKIE  TAVAADAVQS  SAMMARSTRA  MTSQEIFLSQ
251 IKAGAISGWN  KYQVLPSVTA  AQAILESGWG  QSQLATQGNN  LFGIKGSYQG
301 QSIYFPTQEW  NGSQYITIQD  AFRKYPNWSA  SVEDHGAFV  VNPRYSNLIG
351 VTDYRRVASL  LQQDGYATAP  TYASSLISII  EYNKLHEWDQ  EALSGQASGG
401 NDNNQVQPDQ  DVTPTSGTHK  FTKTTTIHNA  PDATSAVVGT  YNAGETVNYN
451 GKLTVGNATW  LRYQSYSGVS  RYVMISQTTT  NDNNNQATVT  PASGSYKFTA
501 KTNIRSAASK  TAQVVGTYNA  GETVYYNGKI  TTGGTTWLR  LSYSGAQHYV
551 AMSGDEVGSV  AKPDVVATSG  SYRFTKTTAI  KSSPATSAT  VGSYNAGDTV
601 YYNGKVTTNG  QTWLRYMSYS  GAQHYVQISG  ESTSTNVDPK  QVTPQSGSYR
651 FTQTTAIKNT  PAGNAPSVGT  YSAGDTVYYN  AKVTTANGQ  LRYLSYSGAQ
701 HYVAISGNAA  TGNTTSKPVT  NSQGAFRFVT  TTNIRTAPST  RASVVGEYNP
751 GETVYYNGTV  QAEGYTWLR  LSRSGATHYV  AKLEG
```

**FIG. S1** Protein view (Mascot, Matrix Science) and coverage of the LC/MS spectra of Acm2 isolated from (A) *Lactobacillus plantarum* WCFS1 and (B) the *tagE5E6* deletion mutant strain. Detected peptides are shown in red. The predicted signal peptide and the AST domain are presented in bold and underlined, respectively (5).

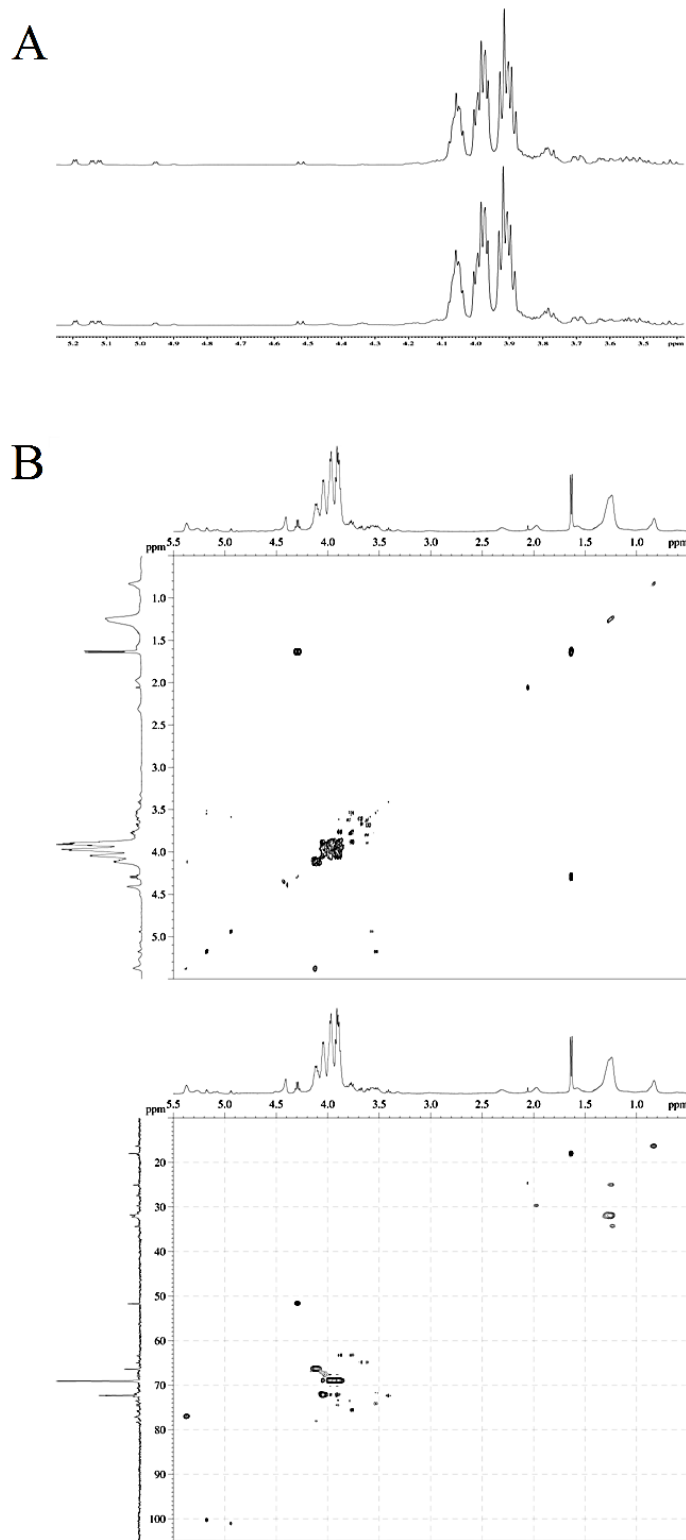

**Fig. S2** The nuclear magnetic resonance (NMR) analysis of purified LTA and deacylated dealanylated LTA (dd-LTA) from wild-type and  $\Delta tagE5E6$  mutant. (A) Comparison of  $^1H$  NMR spectra of dd-LTA from wild-type (upper panel) and  $\Delta tagE5E6$  (lower panel). (B) COSY (upper panel) and HSQC (lower panel) spectra of purified LTA from  $\Delta tagE5E6$ .

## References

1. **Morath S, Geyer A, Hartung T.** 2001. Structure-function relationship of cytokine induction by lipoteichoic acid from *Staphylococcus aureus*. *J Exp Med* **193**:393-397.
2. **Ames BN.** 1966. Assay of inorganic phosphate, total phosphate and phosphatase. *Methods in Enzymology* **8**:115-118.
3. **Allen RJ.** 1940. The estimation of phosphorus. *The Biochemical journal* **34**:858-865.
4. **Simpson WA, Ofek I, Beachey EH.** 1980. Binding of streptococcal lipoteichoic acid to the fatty acid binding sites on serum albumin. *J Biol Chem* **255**:6092-6097.
5. **Rolain T, Bernard E, Beaussart A, Degand H, Courtin P, Egge-Jacobsen W, Bron PA, Morsomme P, Kleerebezem M, Chapot-Chartier M-P, Dufrene YF, Hols P.** 2013. O-glycosylation as a novel control mechanism of peptidoglycan hydrolase activity. *Journal of Biological Chemistry*.
